# Supplementary material for: Direct recycling of EV production scrap NMC532 cathode materials
Source: Royal Society of Chemistry journal article supplement (doi:10.1039/d4su00389f), 2024-01-01
Supplement: d4su00389f1.pdf [file d4su00389f1.pdf]

## Supporting information

### Direct recycling of EV production scrap NMC532 cathode materials

Emily C. Giles<sup>a,b</sup>, Abbey Jarvis<sup>a,b</sup>, Alexander T. Sargent<sup>a,b</sup>, Paul A. Anderson<sup>a,b</sup>, Phoebe K. Allan<sup>a,b</sup>, and Peter R. Slater<sup>a,b</sup>

<sup>a</sup>School of Chemistry, University of Birmingham, Edgbaston, Birmingham B15 2TT, United Kingdom. Email: p.r.slater@bham.ac.uk and p.a.anderson@bham.ac.uk

<sup>b</sup>The Faraday Institution, Quad One, Harwell Science and Innovation Campus, Didcot, UK

S1. ICP-OES analysis of cathode material before treatment.

|                  | %mass |      |      |      |     |     |             |       |            |
|------------------|-------|------|------|------|-----|-----|-------------|-------|------------|
|                  | Li    | Mn   | Ni   | Co   | Al  | Cu  | Undissolved | Total | Unmeasured |
| Cathode material | 6.0   | 13.0 | 23.5 | 11.8 | 8.2 | 0.0 | 5.1         | 67.7  | 32.3       |

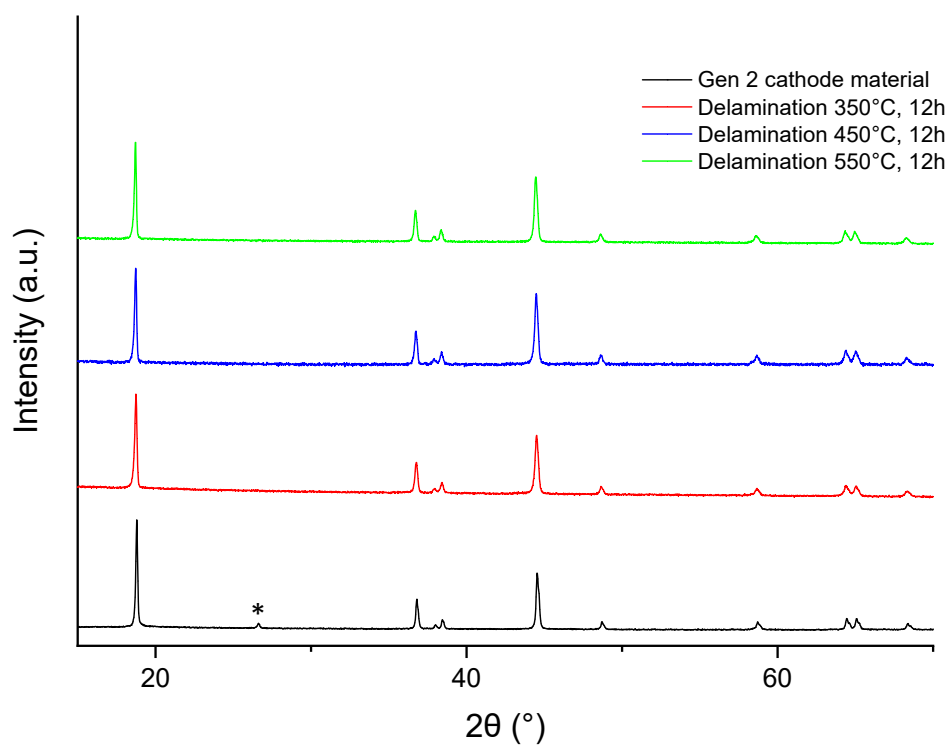

S2. XRD patterns of cathode material a) before treatment (black), b) after delamination firing at 350°C for 12h (red), c) after delamination firing at 450°C for 12h (blue) and d) after delamination firing at 550°C for 12h (green). Carbon peaks denoted by an asterisk (\*).

S3. ICP-OES molar ratio of thermally treated cathode materials.

|                     | Molar ratio |      |      |                               |
|---------------------|-------------|------|------|-------------------------------|
|                     | Ni          | Mn   | Co   | Li:M ratio where M=Mn, Ni and |
|                     |             |      |      | Co                            |
| Thermal treatment:  |             |      |      |                               |
| 500°C in air for 3h | 0.48        | 0.28 | 0.24 | 0.97                          |

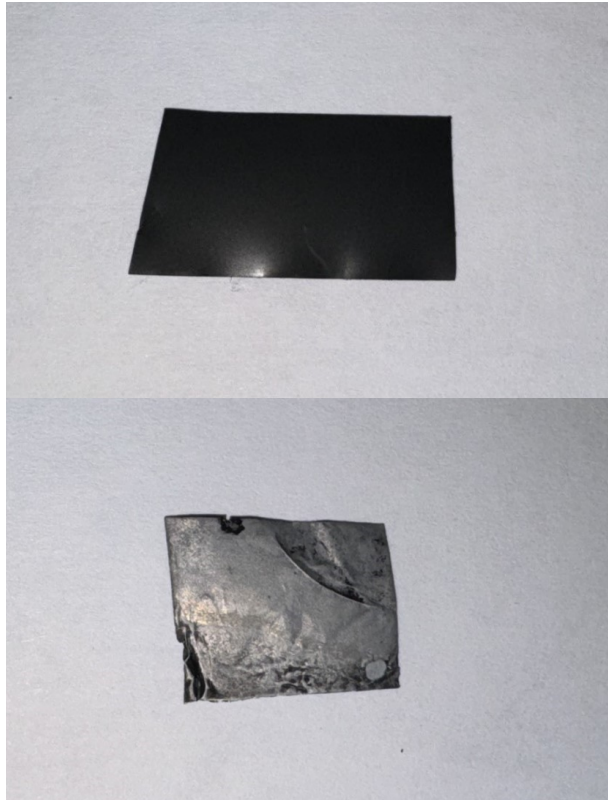

S4. Images of cathode coating on Al foil before heat treatment (top), after heating to 500°C for 3h and removal of cathode material (bottom).

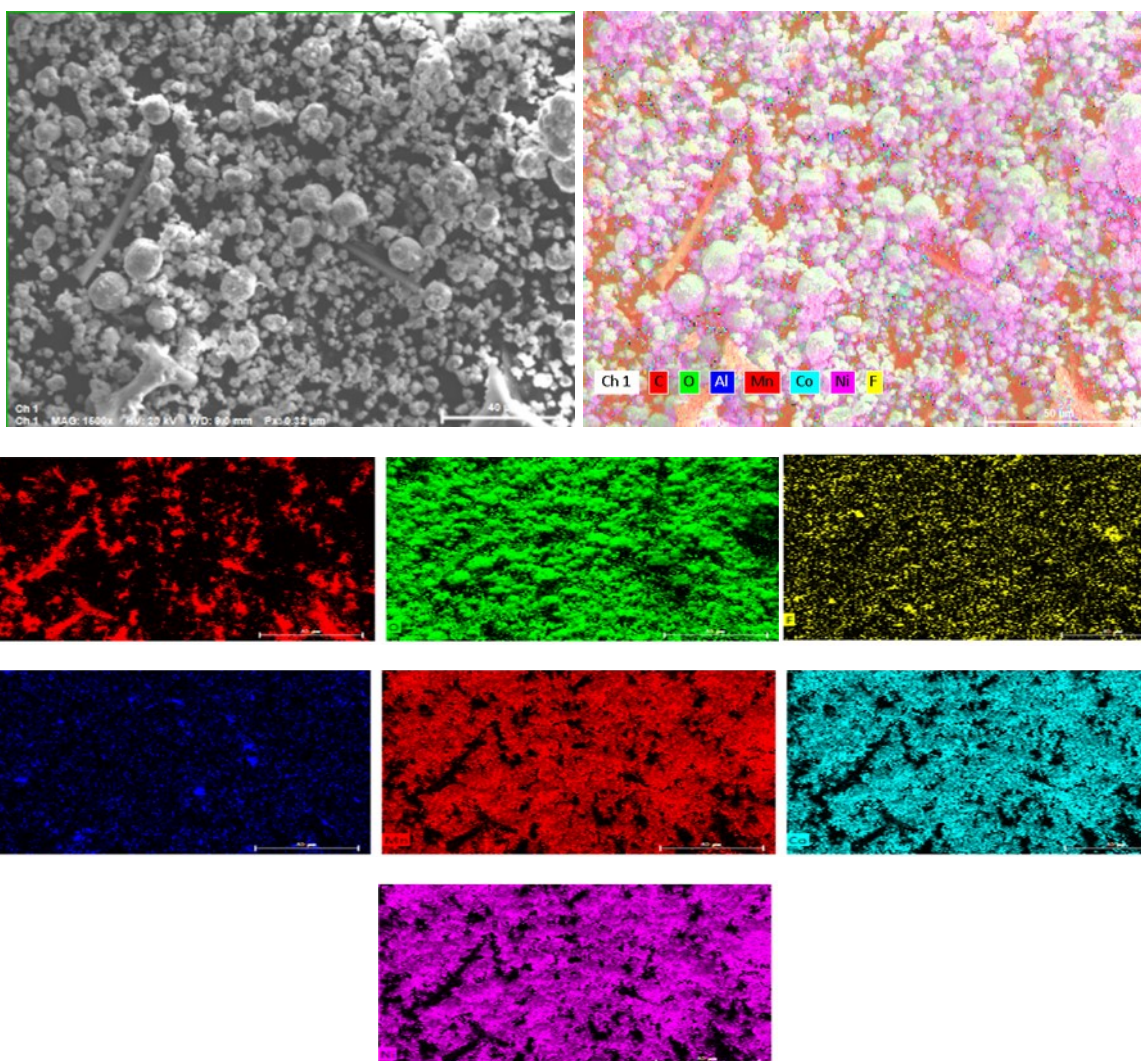

S5. SEM EDX images of cathode material before thermal treatment.

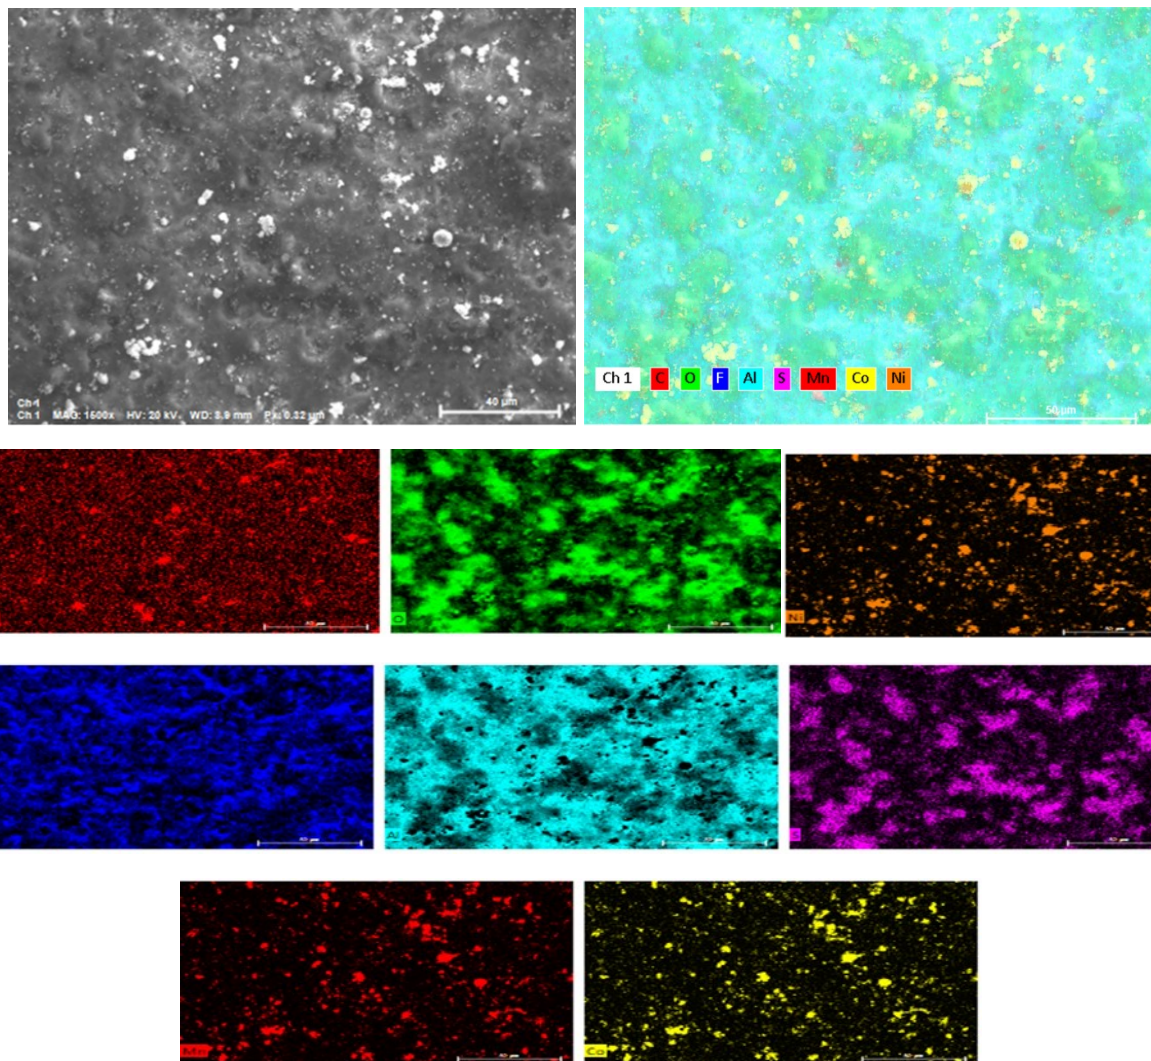

S6. SEM EDX images of aluminium current collector after delamination.

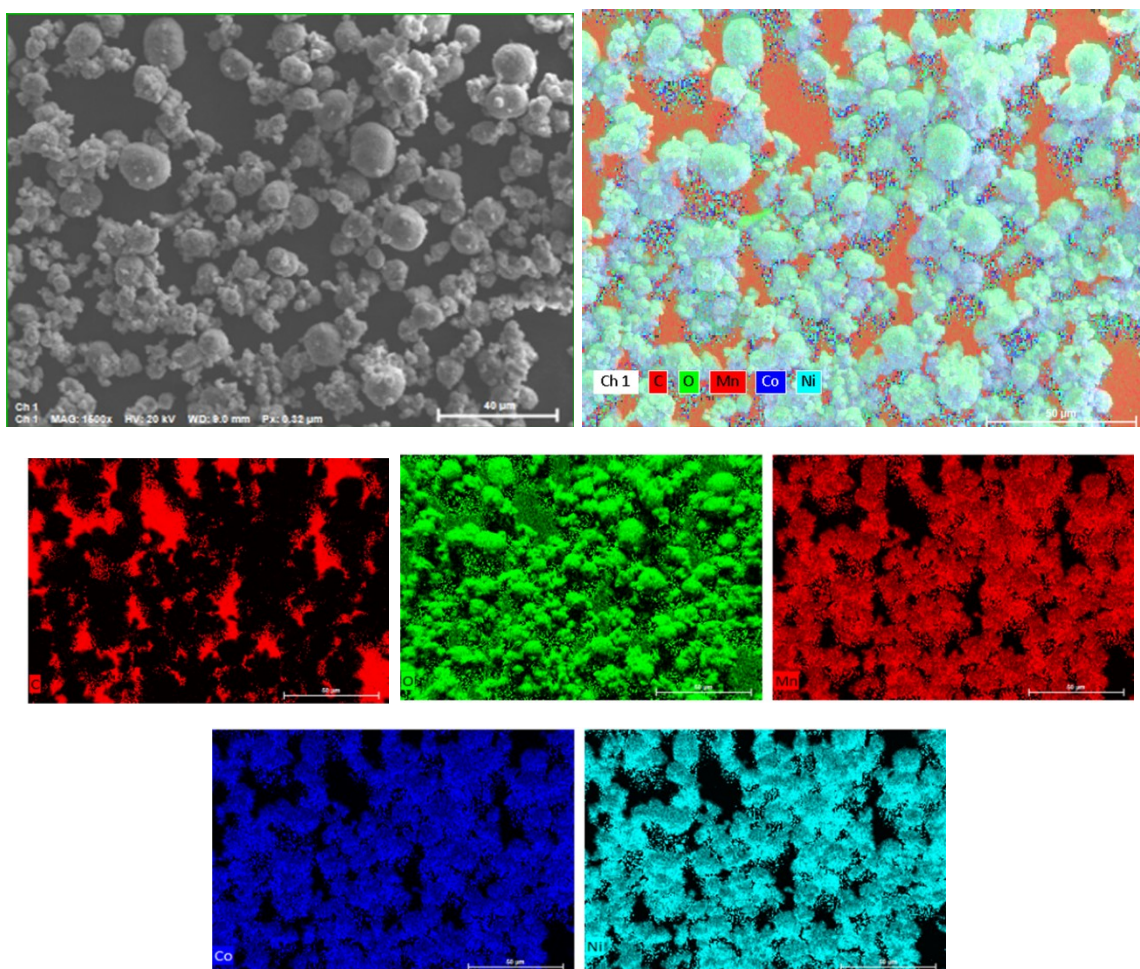

S7. SEM images of cathode material after relithiation (500°C for 3h in air followed by 825°C for 3h in O<sub>2</sub> with 10 wt% LiOH.H<sub>2</sub>O) illustrating complete removal of F.
